# Supplementary material
Source: ML conference proceedings conference paper supplement (https://openreview.net/forum?id=i7LuLGc2mu)
Supplement: supplementary_material [file analysis.xls]

## Sheet: Sheet1
time
new	1	5	10	15	20			old	1	5	10	15	20
100		0.002	0.0041	0.0041				100		0.0007	0.006	0.006
90								90
80		0.0019	0.006	0.0038				80		0.002	0.0021	0.002
70								70
60		0.0019	0.0054	0.0035				60		0.0028	0.0026	0.0028
ITER
new	1	5	10	15	20			old	1	5	10	15	20
100		5.5	12.58	13.8				100		2.3	2.36	2.37
90								90
80		6.11	19.14	13.7				80		6.97	7.3	6.8
70								70
60		7	17.53	12.8266				60		8	11.77	11.65
MSE
new	1	5	10	15	20			old	1	5	10	15	20
100		0.822	1.8479	2.9				100		0.2263	0.2291	0.2298
90								90
80		0.6266	1.56	3.052				80		0.4483	0.46	0.4576
70								70
60		0.49	1.55	3.137				60		1.4	1.42	1.42
epsilon
new	1	5	10	15	20
100		0.8929	0.8282	0.7472
90
80		0.8279	0.7839	0.7355
70
60		0.7288	0.6839	0.7219
angle
new	1	5	10	15	20			old	1	5	10	15	20
100		0.3258	0.5374	0.7904				100		0.0644	0.0322	0.0207
90								90
80		0.2905	0.461	0.7975				80		0.2012	0.1092	0.0762
70								70
60		0.245	0.4989	0.5136				60		1.7592	0.8763	0.7731
align
new	1	5	10	15	20			old	1	5	10	15	20
100		0.7414	0.4086	0.1519				100		0.9907	0.9903	0.9901
90								90
80		0.8493	0.6263	0.3208				80		0.8768	0.8756	0.8716
70								70
60		0.9214	0.6918	0.5072				60		0.6926	0.6876	0.6473
